# Supplementary material
Source: bioRxiv or medRxiv preprint supplement (http://biorxiv.org/highwire/filestream/26780/field_highwire_adjunct_files/0/095018-1.pdf)
Supplement: Supplementary file [file 095018-1.pdf]

# Supplementary Information for

## Universal scaling of maximum speed with body mass - Why the largest animals are not the fastest

Myriam R. Hirt, Walter Jetz, Björn C. Rall, Ulrich Brose

### Supplementary Table 1

Distribution of data across movement types and taxa.

| movement mode | taxonomic group | n data points |
|---------------|-----------------|---------------|
| running       | arthropods      | 44            |
|               | birds           | 3             |
|               | mammals         | 262           |
|               | reptiles        | 144           |
| flying        | arthropods      | 19            |
|               | birds           | 29            |
|               | mammals         | 7             |
| swimming      | arthropods      | 1             |
|               | birds           | 5             |
|               | fish            | 81            |
|               | mammals         | 16            |
|               | mollusks        | 5             |
| reptiles      | 1               |               |

### Supplementary Table 2

Distribution of data across study and publication types.

| study type       | nbr. of data points |
|------------------|---------------------|
| field study      | 34                  |
| laboratory study | 113                 |
| meta-study       | 404                 |
| unclear          | 66                  |

### Supplementary Table 3

$\Delta$ BIC values for comparing the seven speed models. Taxonomic groups comprise arthropods, birds, fish, mammals, mollusks, reptiles.

| models                      | $\Delta$ BIC |         |          |
|-----------------------------|--------------|---------|----------|
|                             | flying       | running | swimming |
| <b>time-dependent model</b> | 0            | 0       | 0        |
| <b>polynomial</b>           | 6.79         | 118.20  | 19.51    |
| <b>polynomial (* taxon)</b> | 17.96        | 15.97   | 24.90    |
| <b>polynomial (+ taxon)</b> | 8.03         | 78.60   | 18.81    |
| <b>power law (* taxon)</b>  | 12.90        | 122.57  | 8.82     |
| <b>power law (+ taxon)</b>  | 13.52        | 112.38  | 25.55    |
| <b>power law</b>            | 11.95        | 191.66  | 46.48    |

Note that for the time-dependent model, taxon could not be directly included because of the complexity of fitting a non-linear model with four free parameters. Therefore, we conducted a residual analysis (see main text).

#### Supplementary Table 4

Fitted values of the time-dependent maximum speed model: parameters a, b, c and d (from Eq. 5) with standard errors and resulting equations for the different movement modes (flying, running, swimming). Body mass M in kg and speed v in km h<sup>-1</sup>.

| movement mode | a            | b           | h            | i           | equation                                            |
|---------------|--------------|-------------|--------------|-------------|-----------------------------------------------------|
| flying        | 144 ± 17.05  | 0.24 ± 0.01 | 2.31 ± 1.28  | 0.72 ± 0.25 | $v_{real} = 144 M^{0.24}(1 - e^{-2.31 M^{0.72}})$   |
| running       | 25.78 ± 0.88 | 0.27 ± 0.01 | 19.36 ± 6.33 | 0.6 ± 0.05  | $v_{real} = 25.78 M^{0.27}(1 - e^{-19.36 M^{0.6}})$ |
| swimming      | 10.71 ± 0.84 | 0.36 ± 0.02 | 21.2 ± 15.17 | 0.56 ± 0.07 | $v_{real} = 10.71 M^{0.36}(1 - e^{-21.2 M^{0.56}})$ |

### Supplementary Table 5

References for the masses and speed predictions of Table 1 in the main text.

| species              | mass | power law | reference           |                      |
|----------------------|------|-----------|---------------------|----------------------|
|                      |      |           | morphological model | time-dependent model |
| <i>Dromaius</i>      | (23) | *         | (23)                | +                    |
| <i>Struthio</i>      | (23) | *         | (23)                | +                    |
| <i>Patagornis</i>    | (23) | *         | (31)                | +                    |
| <i>Velociraptor</i>  | (23) | *         | (23)                | +                    |
| <i>Allosaurus</i>    | (23) | *         | (23)                | +                    |
| <i>Tyrannosaurus</i> | (23) | *         | (23)                | +                    |
| <i>Triceratops</i>   | (24) | *         | (24)                | +                    |
| <i>Apatosaurus</i>   | (24) | *         | (24)                | +                    |
| <i>Brachiosaurus</i> | (24) | *         | (24)                | +                    |

\* prediction from a power law (equ. 1)

+ prediction from our model (equ. 5)
